# Supplementary material for: Loss of functional System x-c uncouples aberrant postnatal neurogenesis from epileptogenesis in the hippocampus of Kcna1-Ko mice
Source: PubMed Central journal article supplement — Cell Rep. Author manuscript; Available in PMC 2022 Dec 15. (PMC9753929; doi:10.1016/j.celrep.2022.111696), 2022-11-22
Supplement: NIHMS1852531-supplement-1.pdf [file NIHMS1852531-supplement-1.pdf]

**Cell Reports, Volume 41**

**Supplemental information**

**Loss of functional System x-c uncouples aberrant  
postnatal neurogenesis from epileptogenesis  
in the hippocampus of *Kcna1*-KO mice**

**Macarena S. Aloï, Samantha J. Thompson, Nicholas Quartapella, and Jeffrey L. Noebels**

## GCL Apex (40x)

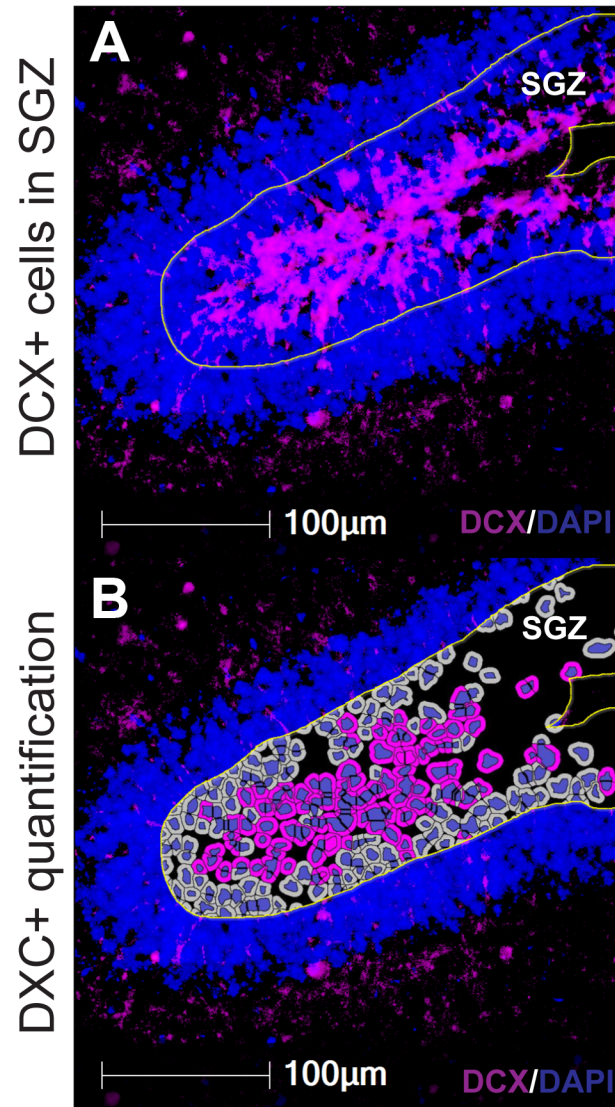

**Supplemental Figure 1: Digital pathology using Halo for the quantification of doublecortin-expressing cells at the apex of the granule cell layer in the dentate gyrus.** Representative images of higher power (40x) maximum intensity projections from apex of the granule cell layer (GCL) of the dentate gyrus (DG). **A)** Sub-granular zone (SGZ) is defined by positive doublecortin (DCX) stain, allowing demarcation of the SGZ annotation layer. **B)** Identification of DAPI+ nuclei expressing DCX with Halo FISH-IF module. Related to the *Quantification of Dentate Gyrus Area and Automated Cell Detection* section of STAR Methods.

## Hippocampus (40x stiched images)

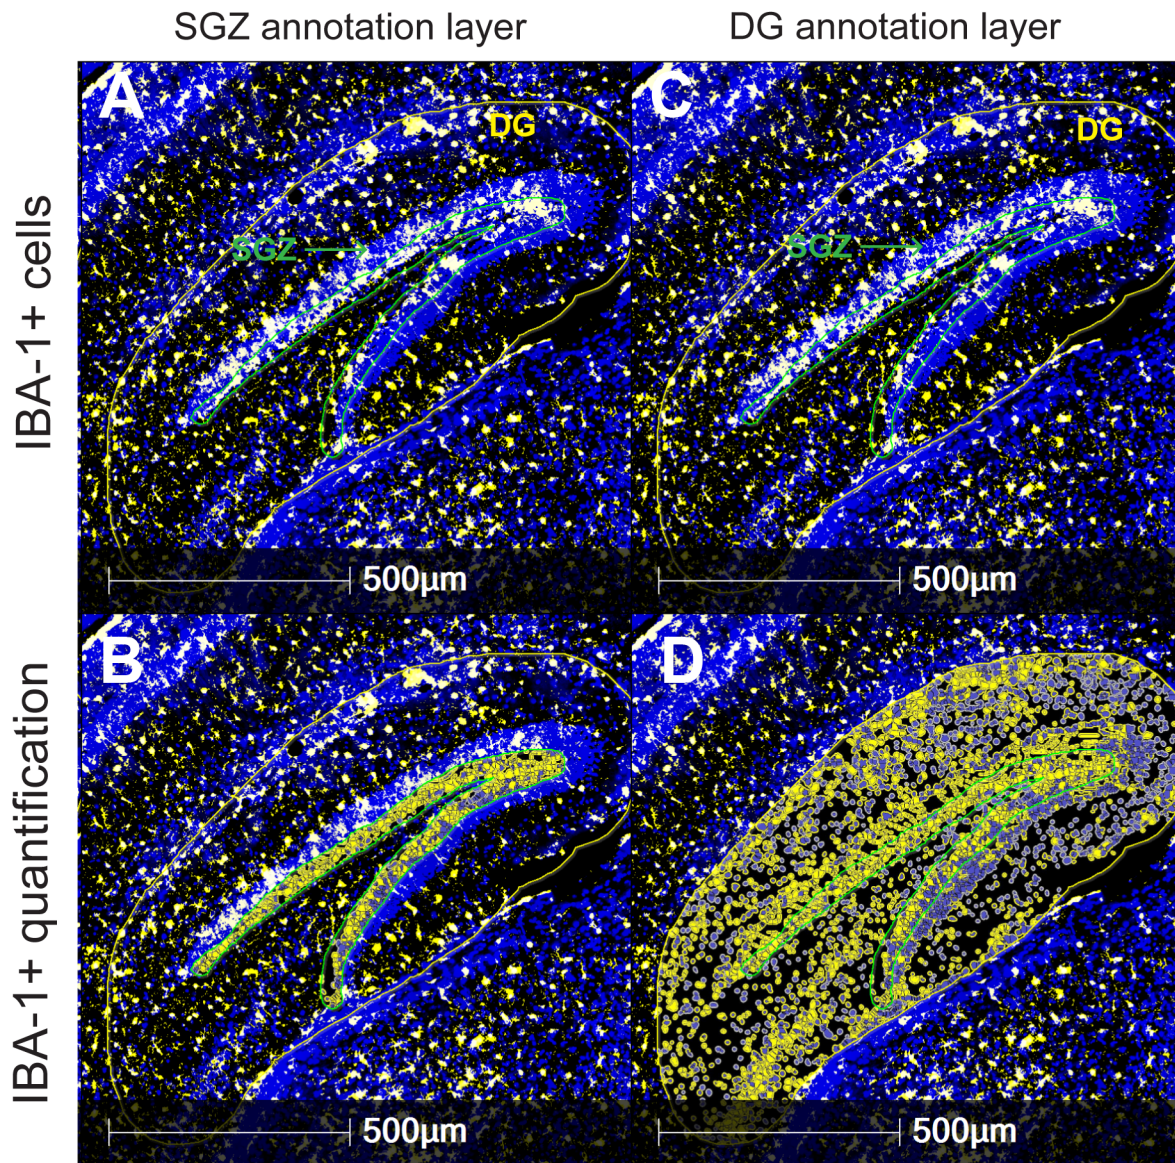

**Supplemental Figure 2: Digital pathology using Halo for the quantification of IBA-1-expressing cells in dentate gyrus (DG) and sub-granular zones (SGZ).** Representative high power (40x) image tiles stitched to reveal hippocampal structures and microglial (IBA-1+ cell) populations. **A)** The SGZ annotation layer (green) was outlined over the entire GLC. **B)** Representative image showing the identification of DAPI+ nuclei in the SGZ expressing IBA-1 with FISH-IF module. **C)** The DG annotation layer (yellow) was outlined for each stitched image. **D)** Representative image showing the identification of DAPI+ nuclei in the DG expressing IBA-1 with FISH-IF module. We followed the same approach to quantify astrocytosis using glial acidic fibrillary protein (GFAP) as a marker of activated astrocytes (Suppl Fig 5). Related to the *Quantification of Dentate Gyrus Area and Automated Cell Detection* section of STAR Methods.

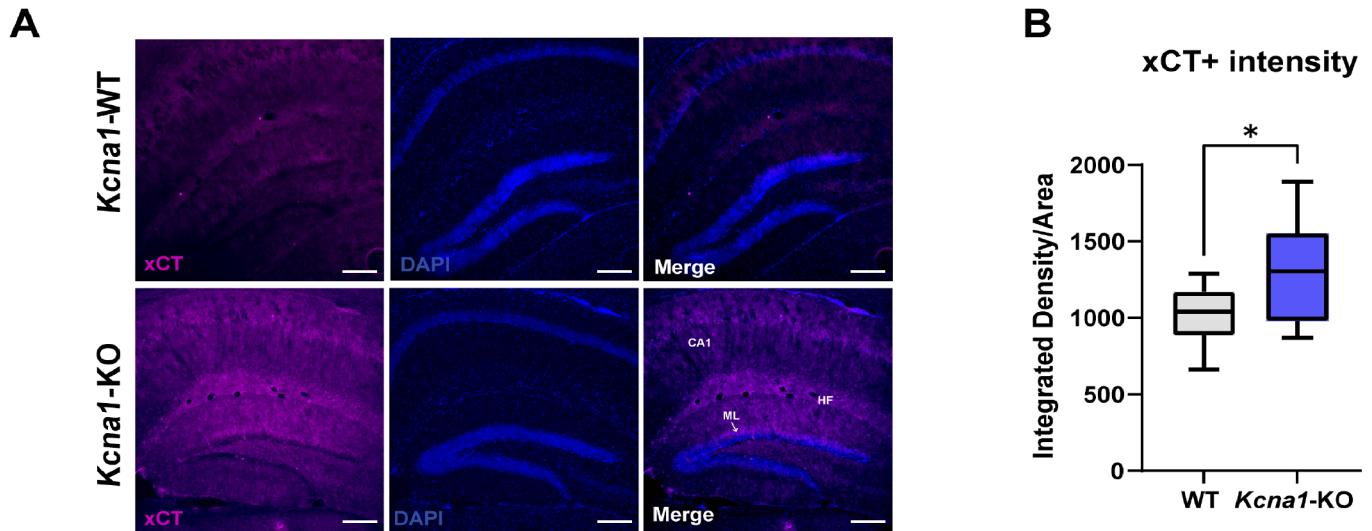

**Supplemental Figure 3: The functional unit of Sxc, xCT, is elevated in the Kcna1-KO hippocampus. A)** Representative low power (10x) images of hippocampi from littermate *Kcna1*-WT (n=3) and *Kcna1*-KO (n=3) mice immunolabeled with anti-xCT. Staining is intense in inner layer (arrow) and throughout dentate molecular layer (ML), the hippocampal fissure (HF) and pyramidal cell layer (CA1) but does not label granule cells. **B)** Quantification of integrated density per hippocampal area showed increased xCT immunolabeling in the *Kcna1*-KO hippocampus relative to wild-type littermates at P30. Scale bars = 250  $\mu$ m. Data are represented as mean  $\pm$  SEM. Related to *Cells in the Kcna1-KO hippocampus show increased expression of the functional unit of Sxc* results section.

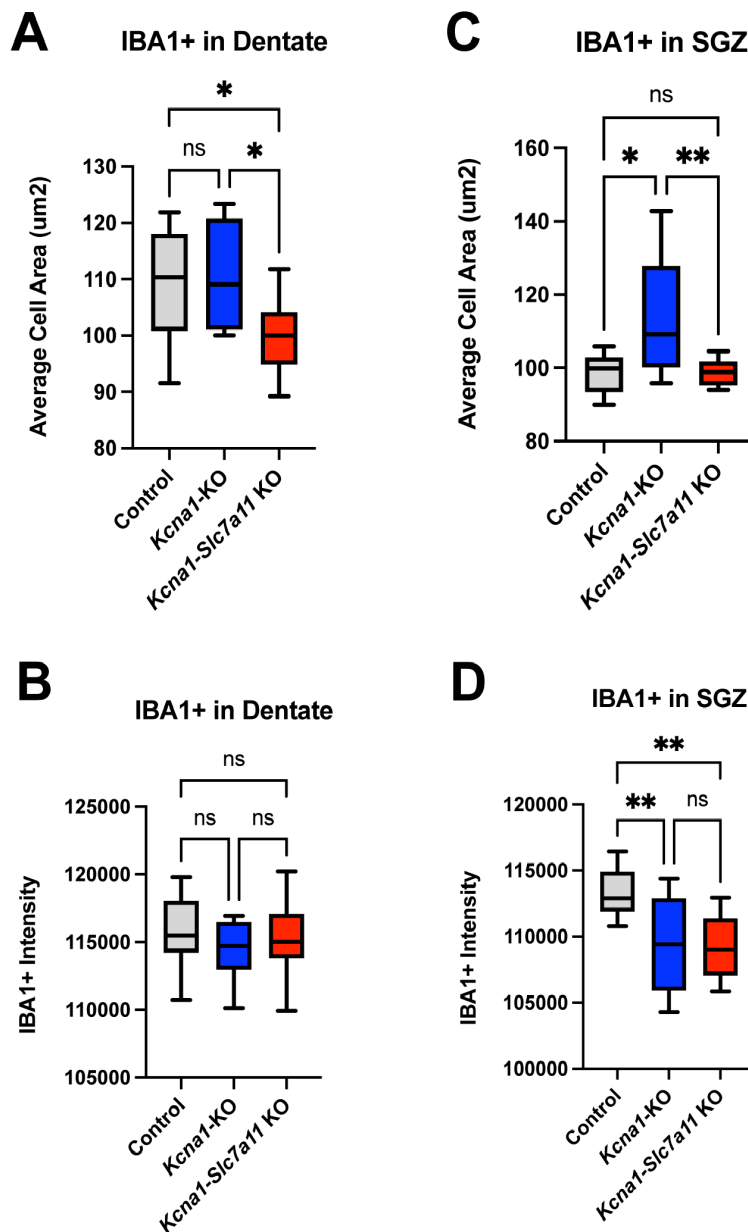

**Supplemental Figure 4: Microglial changes during *Kcna1*-KO epileptogenesis are blunted by lack of functional *Sxc*.** **A)** IBA-1 cells are reduced in area in the *Kcna1-Slc7a11*-KO DG relative to *Kcna1*-KO and wild-type mice. **B)** There is no difference in IBA-1 labeling intensity of microglia in the DG between genotypes. **C)** In the SGZ IBA-1 positive cells were significantly larger in average area (um<sup>2</sup>) in the *Kcna1*-KO brain relative to WT and *Kcna1-Slc7a11*-KO. **D)** IBA-1 intensity was also reduced in *Kcna1*-KO and *Kcna1-Slc7a11*-KO. Data were analyzed using HALO Software, Indica Labs and are represented as mean ± SEM. Related to the *Loss of Sxc in the Kcna1-KO brain decreases microglia density in the dentate gyrus* results section.

## Hippocampus (40X)

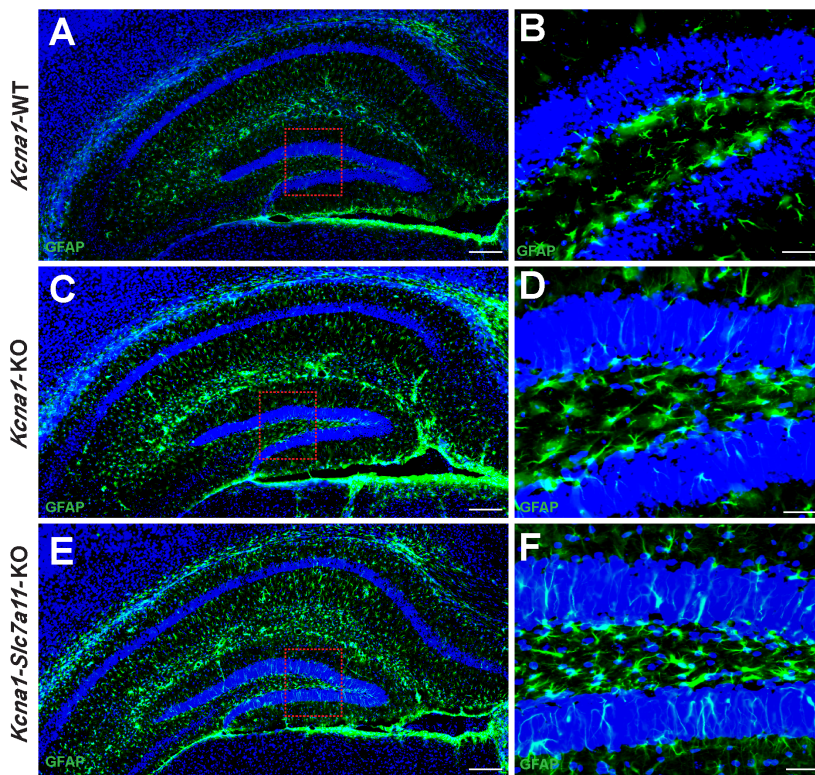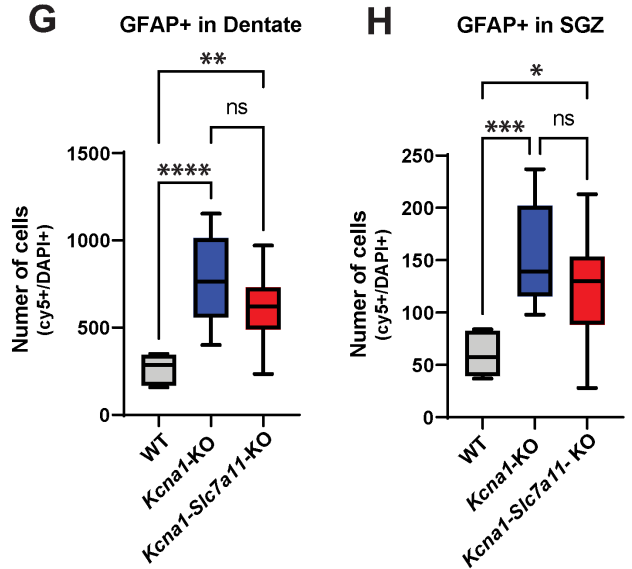

**Supplemental Figure 5: Increased Astrogliosis in the Dentate Gyrus and Sub-granular Zone of the *Kcna1*-KO brain is unaffected by developmental absence of functional *Sxc*.** Representative images of high power (40x) stitched images (A,C,E) and single field of view (B,D,F) of whole hippocampi. A-B) *Kcna1*-WT (n=3 mice, 12 stitched images) C-D) *Kcna1*-KO (n=3 mice, 12 stitched images), E-F) *Kcna1-Slc7a11*-KO (n=3 mice, 12 stitched images) mice immunolabeled with anti-GFAP to mark activated astrocytes. G) Quantification of GFAP+ astrocytes in the Dentate Gyrus (DG) and H) in the Sub Granular Zone (SGZ) of the granule cell layer (HALO Software, Indica Labs). Scale bars = 250  $\mu$ m. Data are represented as mean  $\pm$  SEM. Related to the **Astrogliosis in *Kcna1*-KO hippocampus is unaffected by developmental loss of functional *Sxc*** results section.

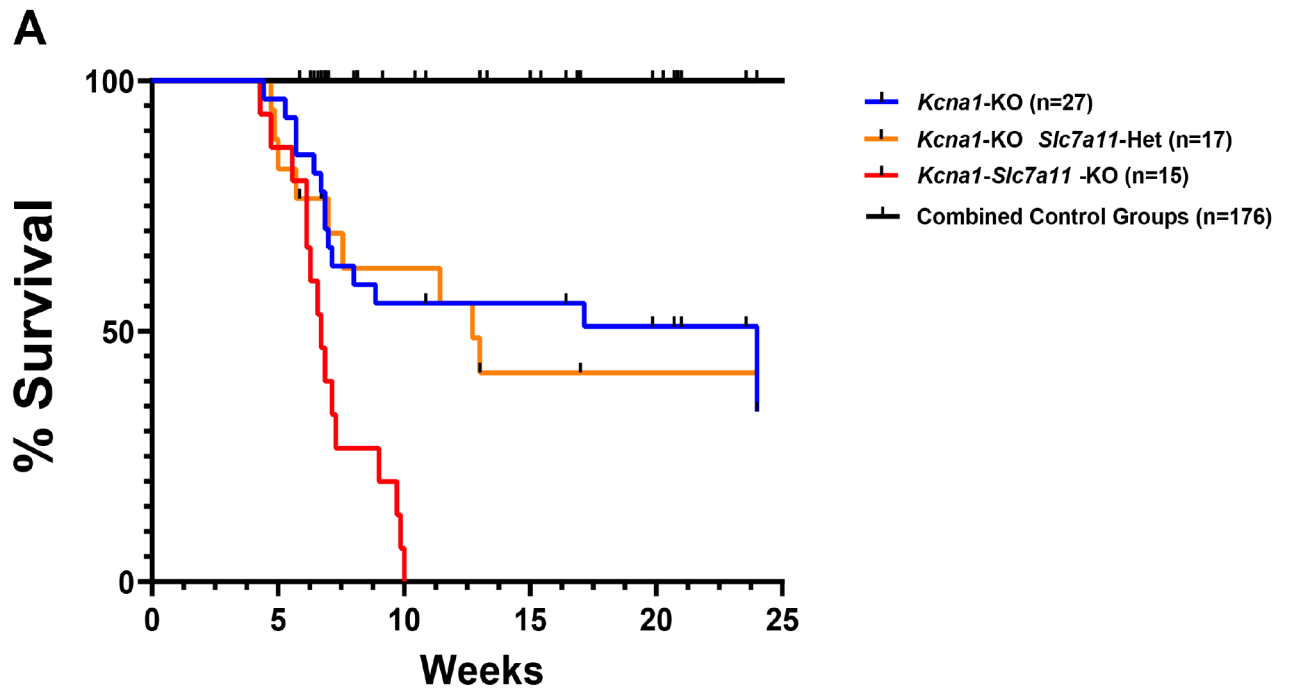

**B**

Summary of pairwise comparisons using Log-Rank test with Bonferroni corrections

|                                       | Control | <i>Kcna1</i> -KO- <i>Slc7a11</i> -Het | <i>Kcna1</i> -KO- <i>Slc7a11</i> -WT |
|---------------------------------------|---------|---------------------------------------|--------------------------------------|
| <i>Kcna1</i> -KO- <i>Slc7a11</i> -Het | p<2e-16 | n/a                                   | n/a                                  |
| <i>Kcna1</i> -KO- <i>Slc7a11</i> -WT  | p<2e-16 | 0.19068                               | n/a                                  |
| <i>Kcna1</i> - <i>Slc7a11</i> -KO     | p<2e-16 | 0.05254                               | 0.00062                              |

**Supplemental Figure 6: Genetic loss of functional Sxc results in fully penetrant SUDEP in the *Kcna1*-KO line.**

**A)** Survival probability plots of *Kcna1*-KO, *Kcna1*-KO-*Slc7a11*-het, *Kcna1*-*Slc7a11*-KO, and combined control mice population genotypes resulting from crosses including *Slc7a11*-KO, *Slc7a11*-Het, *Kcna1*-Het-*Slc7a11*-WT,

*Kcna1*-Het-*Slc7a11*-KO, *Kcna1*-Het-*Slc7a11*-Het, and wild-type ( $p < 2.0 \times 10^{-16}$ ). **B)** Summary of pairwise comparisons using Log-Rank test with Bonferroni corrections. Data were analyzed in R-studio and plotted using Prism v 9.0.0. Related to the **Genetic loss of functional Sxc modifies sudden death risk in *Kcna1*-KO mice** results section.
